# Supplementary material for: The distribution of work-related musculoskeletal disorders among nurses in sub-Saharan Africa: a scoping review protocol
Source: Springer Nature journal article supplement (doi:10.1186/s13643-021-01774-7), 2021-08-13
Supplement: MOESM1 [file 19569538]

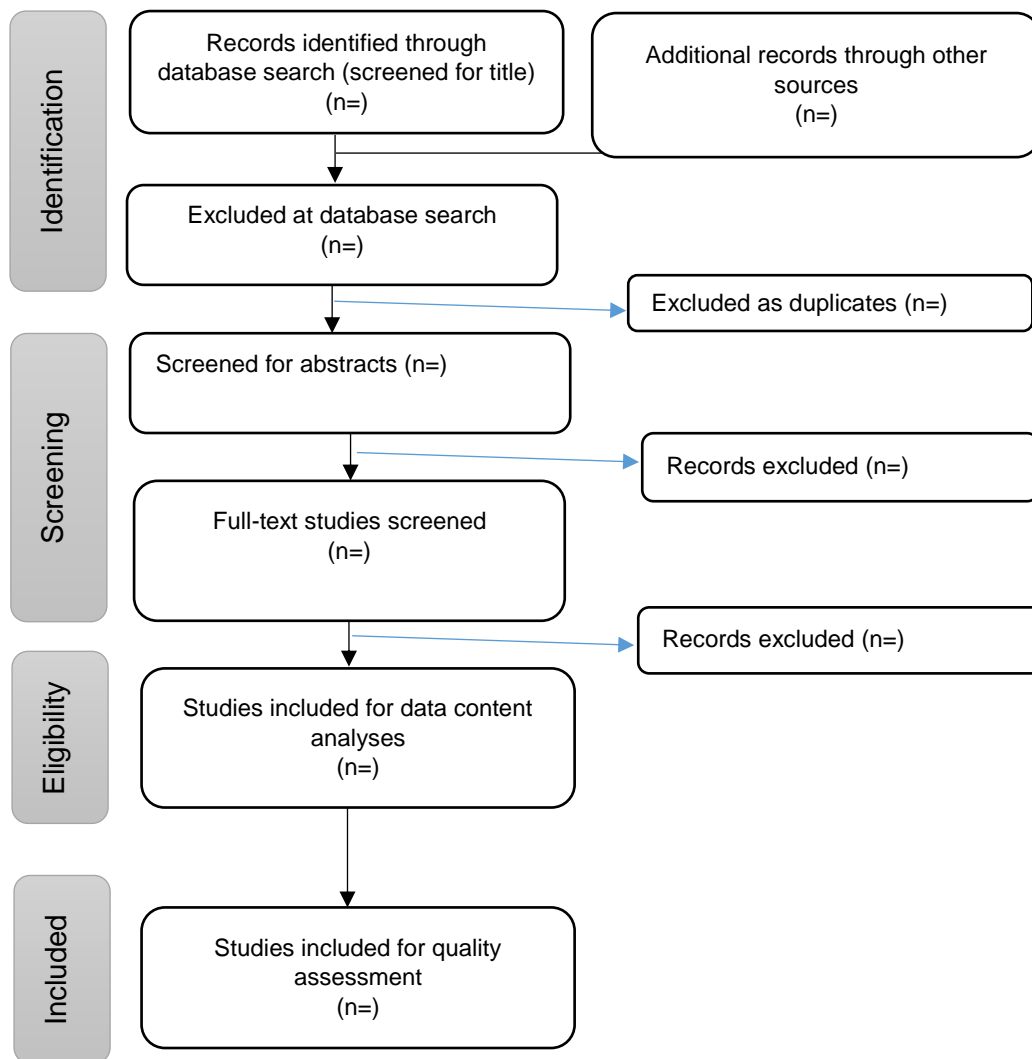

**Figure 1:** PRISMA flow diagram
